# Supplementary material for: A DNA synthesis inhibitor is protective against proteotoxic stressors via modulation of fertility pathways in Caenorhabditis elegans
Source: PubMed Central journal article supplement (PMC3838778; doi:10.18632/aging.100605), 2013-10-10
Supplement: aging-05-759-s001.pdf [file aging-05-759-s001.pdf]

## SUPPLEMENTARY FIGURES

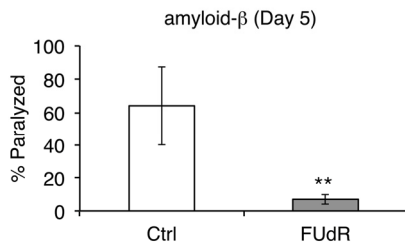

**Suppl. Figure 1. Transient administration of FUdR during spermatogenesis rescues A $\beta$  pathology.** Temperature-sensitive strain, CL4176 [*smg-1(cc546ts); dvl-27(myo-3::Ab3-42 let 39UTR(pAF29))*], which expresses amyloid- $\beta_{3-42}$  peptide, was scored for paralysis on day 5 of adulthood after transient administration of FUdR (100  $\mu$ g/ml) during spermatogenesis. FUdR-treatment significantly reduces paralysis compared to control animals. (\*\*= $p < 0.01$ , Student's t-test).

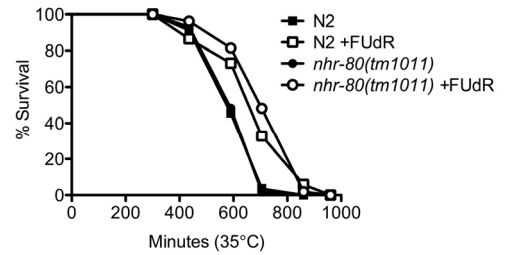

**Suppl. Figure 2. FUdR confers thermotolerance via germline signals that are independent of *nhr-80*.** FUdR-treatment (100  $\mu$ g/ml) significantly extends *nhr-80(tm1011)* survival to a similar extent as wild-type N2 animals. Animals were reared at 25°C and shifted to 35°C as young adults.

## SUPPLEMENTARY TABLES

Please browse full text version of this manuscript to see the the Supplementary **Table S1** and **Table S2**.
